# Supplementary material for: Early prediction of clinical response to checkpoint inhibitor therapy in human solid tumors through mathematical modeling
Source: eLife. 2021 Nov 9;10:e70130. doi: 10.7554/eLife.70130 (PMC8629426; doi:10.7554/eLife.70130)
Supplement: Appendix 1—figure 3—source data 1. [file elife-70130-app1-fig3-data1.xlsx]

## Sheet: Appendix 1-figure 3 data
Appendix 1-figure 3A								Appendix 1-figure 3B
			calibration, Responders	calibration, non-esponders	validation, responders	validation, non-responders					calibration, Responders	calibration, non-esponders	validation, responders	validation, non-responders
Validating by RCC		Λ, mean	0.685898	0.0523227	0.943059	0.172055		Validating by RCC		μ, mean	0.0373712	0.0133101	0.154037	0.0070002
		Λ, StDev	0.142249	0.00906348	1.20544	0.109716				μ, StDev	0.0351492	0.0144584	0.248674	0.00750025
Validating by CRC		Λ, mean	0.595794	0.0673598	6.77081	0.0266504		Validating by CRC		μ, mean	0.0440507	0.00891679	0.100646	0.0383499
		Λ, StDev	0.13958	0.0102068	5.24902	0.00713991				μ, StDev	0.117029	0.00796573	0.0181834	0.0189262
Validating by NSCLC		Λ, mean	0.642371	0.0516307	1.6677	0.0801477		Validating by NSCLC		μ, mean	0.0586631	0.0126369	0.0322484	0.0126952
		Λ, StDev	0.140747	0.00850838	5.31503	0.0243344				μ, StDev	0.117966	0.0149266	0.00695987	0.0106746
Validating by melanoma		Λ, mean	1.93938	0.0539618	0.168895	0.328441		Validating by melanoma		μ, mean	0.0622839	0.0129927	0.013742	0.00644935
		Λ, StDev	1.93611	0.00931914	0.0655104	0.17167				μ, StDev	0.116811	0.0143003	0.00686436	0.00644935
Validating by SCLC		Λ, mean	0.648972	0.0489219	2.30021	0.786891		Validating by SCLC		μ, mean	0.0586654	0.0130373	0.0246854	0.0103115
		Λ, StDev	0.143794	0.00888095	4.29837	0.398498				μ, StDev	0.115333	0.0147737	0.00647756	0.00778261
Validating by UCC		Λ, mean	0.599828	0.0764618	2.25602	0.037164		Validating by UCC		μ, mean	0.0657084	0.0156996	0.0136063	0.00662114
		Λ, StDev	0.136334	0.0148553	2.57793	0.00653048				μ, StDev	0.120073	0.0160797	0.0058081	0.00446553
