# Supplementary material for: Early prediction of clinical response to checkpoint inhibitor therapy in human solid tumors through mathematical modeling
Source: eLife. 2021 Nov 9;10:e70130. doi: 10.7554/eLife.70130 (PMC8629426; doi:10.7554/eLife.70130)
Supplement: Figure 3—source data 1. [file elife-70130-fig3-data1.xlsx]

## Sheet: Figure 3 data
Figure 3a
Calibraiton Cohort, Λ					Calibraiton Cohort, μ
	Λ mean	Λ SEM				μ mean	μ SEM
CR/PR:	0.714286	0.257107			CR/PR:	0.0543407	0.0147462
SD/PD:	0.0994962	0.0264484			SD/PD:	0.0127459	0.00122188
Validation Cohort, Λ					Validation Cohort, μ
	Λ mean	Λ SEM				μ mean	μ SEM
CR/PR:	0.876353	0.101949			CR/PR:	0.0529288	0.00982596
SD/PD:	0.0297371	0.468673			SD/PD:	-0.00642371	0.00316857
