# Supplementary material for: Early prediction of clinical response to checkpoint inhibitor therapy in human solid tumors through mathematical modeling
Source: eLife. 2021 Nov 9;10:e70130. doi: 10.7554/eLife.70130 (PMC8629426; doi:10.7554/eLife.70130)
Supplement: Figure 5—source data 1. [file elife-70130-fig5-data1.xlsx]

## Sheet: Figure 5 data
Figure 5A:						Figure 5B:
Calibration, CD8+ count							<1%	≥1%	<5%	≥5%
	mean	SEM				Calibration	10.2273	45.5446	25.1462	66.6667
PR/CR:	3970	1429				Validation	9.09091	70.9677	29.0909	100
stable/PR:	553.034	147				IHC	14.878	28.4956	20.733	30.8026
Validation, CD8+ count
	mean	SEM
PR/CR:	3770.26	675
stable/PR:	501	113
IHC CD8+ count
	mean	SEM
PR/CR:	4870.77	566.631
stable/PR:	165.279	2604.89
